## **The severe acute respiratory syndrome coronavirus 2 (SARS-CoV-2) envelope (E) protein harbors a conserved BH3-like sequence**

Vincent Navratil <sup>1,2</sup>, Loïc Lionnard <sup>3</sup>, Sonia Longhi <sup>4</sup>, J. Marie Hardwick <sup>5</sup>, Christophe Combet <sup>6</sup> and Abdel Aouacheria <sup>3,\*</sup>

<sup>1</sup> PRABI, Rhône Alpes Bioinformatics Center, UCBL, Lyon1, Université de Lyon, Lyon, France.

<sup>2</sup> European Virus Bioinformatics Center, Leutrargraben 1, D-07743 Jena, Germany

<sup>3</sup> ISEM, Institut des Sciences de l'Evolution de Montpellier, Université de Montpellier, UMR 5554, CNRS, IRD, EPHE, Place Eugène Bataillon, 34095 Montpellier, France

<sup>4</sup> CNRS and Aix-Marseille Univ, Laboratoire Architecture et Fonction des Macromolécules Biologiques (AFMB), UMR 7257, Marseille, France.

<sup>5</sup> W. Harry Feinstone Department of Molecular Microbiology and Immunology, Johns Hopkins University Bloomberg School of Public Health, Baltimore, Maryland 21205, USA

<sup>6</sup> Centre de Recherche en Cancérologie de Lyon, UMR Inserm U1052, CNRS 5286, Université Claude Bernard Lyon 1, Centre Léon Bérard, Lyon, France.

\* Corresponding author

Abdel Aouacheria, ISEM, Institut des Sciences de l'Evolution de Montpellier, Université de Montpellier, CNRS, EPHE, IRD, Montpellier, France. Phone : +33467143751

[abdel.aouacheria@umontpellier.fr](mailto:abdel.aouacheria@umontpellier.fr)

### **Disclaimer text :**

The authors have withdrawn their manuscript whilst they perform additional experiments to test some of their conclusions further. Therefore, the authors do not wish this work to be cited as reference for the project. If you have any questions, please contact the corresponding author.
